# Supplementary material for: Kinetics of the binodal decomposition of the metastable Ni0.5Ru0.5 solid solution
Source: Royal Society of Chemistry journal article supplement (doi:10.1039/d4nj01919a), 2024-01-01

Supplementary materials for article

**Kinetics of the binodal decomposition of the metastable Ni<sub>0.5</sub>Ru<sub>0.5</sub> solid solution**

Evgeny Filatov, Genady Kostin, Alexander Borodin, Denis Pishchur

**S1. Changes in the lattice parameters of the unit cell of the Ni<sub>0.5</sub>Ru<sub>0.5</sub> solid solution upon heating (10 K min<sup>-1</sup>) obtained by the Rietveld refinement.**

| Temperature, °C | Time, min | <i>a</i> , Å | <i>c</i> , Å | <i>V</i> , Å <sup>3</sup> |
|-----------------|-----------|--------------|--------------|---------------------------|
| 25              | 0         | 2.613        | 4.199        | 24.8                      |
| 50              | 27        | 2.613        | 4.200        | 24.8                      |
| 100             | 48        | 2.614        | 4.202        | 24.9                      |
| 150             | 70        | 2.615        | 4.204        | 24.9                      |
| 200             | 92        | 2.616        | 4.206        | 24.9                      |
| 250             | 114       | 2.617        | 4.208        | 25.0                      |
| 300             | 136       | 2.618        | 4.210        | 25.0                      |
| 350             | 158       | 2.619        | 4.211        | 25.0                      |
| 400             | 180       | 2.619        | 4.213        | 25.0                      |
| 450             | 202       | 2.621        | 4.217        | 25.1                      |
| 500             | 224       | 2.623        | 4.219        | 25.1                      |
| * 533           | 246       | 2.625        | 4.222        | 25.2                      |

Standard deviations of the lattice parameters are ±0.002 Å for *a*, ±0.004 Å for *c* and ±0.1 Å<sup>3</sup> for *V*.

\* At this temperature the sample is three-phase.

**S2. The diffraction data of the Ni<sub>0.5</sub>Ru<sub>0.5</sub> solid solution and decomposition products at 400 °C obtained by the Rietveld refinement.**

| Time,<br>min | Ni <sub>0.5</sub> Ru <sub>0.5</sub> |              |                           |                         | «Ru»         |              |                           |                         | «Ni»         |                           |                         |
|--------------|-------------------------------------|--------------|---------------------------|-------------------------|--------------|--------------|---------------------------|-------------------------|--------------|---------------------------|-------------------------|
|              | <i>a</i> , Å                        | <i>c</i> , Å | <i>V</i> , Å <sup>3</sup> | <i>I</i> <sub>101</sub> | <i>a</i> , Å | <i>c</i> , Å | <i>V</i> , Å <sup>3</sup> | <i>I</i> <sub>101</sub> | <i>a</i> , Å | <i>V</i> , Å <sup>3</sup> | <i>I</i> <sub>111</sub> |
| 10           | 2.620                               | 4.212        | 25.0                      | 5715                    | -            | -            | -                         | -                       | -            | -                         | -                       |
| 20           | 2.620                               | 4.212        | 25.0                      | 5708                    | -            | -            | -                         | -                       | -            | -                         | -                       |
| 30           | 2.620                               | 4.212        | 25.0                      | 5708                    | -            | -            | -                         | -                       | -            | -                         | -                       |
| 40           | 2.620                               | 4.212        | 25.0                      | 5708                    | -            | -            | -                         | -                       | -            | -                         | -                       |
| 50           | 2.620                               | 4.212        | 25.0                      | 5708                    | -            | -            | -                         | -                       | -            | -                         | -                       |
| 60           | 2.620                               | 4.212        | 25.0                      | 5708                    | -            | -            | -                         | -                       | -            | -                         | -                       |
| 70           | 2.620                               | 4.212        | 25.0                      | 5708                    | -            | -            | -                         | -                       | -            | -                         | -                       |
| 80           | 2.620                               | 4.212        | 25.0                      | 5708                    | -            | -            | -                         | -                       | -            | -                         | -                       |
| 90           | 2.620                               | 4.212        | 25.0                      | 5708                    | -            | -            | -                         | -                       | -            | -                         | -                       |
| 100          | 2.620                               | 4.212        | 25.0                      | 5708                    | -            | -            | -                         | -                       | -            | -                         | -                       |
| 110          | 2.620                               | 4.212        | 25.0                      | 5708                    | -            | -            | -                         | -                       | -            | -                         | -                       |
| 120          | 2.620                               | 4.212        | 25.0                      | 5708                    | -            | -            | -                         | -                       | -            | -                         | -                       |
| 130          | 2.620                               | 4.212        | 25.0                      | 5708                    | -            | -            | -                         | -                       | -            | -                         | -                       |
| 140          | 2.620                               | 4.212        | 25.0                      | 5708                    | -            | -            | -                         | -                       | -            | -                         | -                       |
| 150          | 2.620                               | 4.212        | 25.0                      | 5708                    | -            | -            | -                         | -                       | -            | -                         | -                       |
| 160          | 2.620                               | 4.212        | 25.0                      | 5708                    | -            | -            | -                         | -                       | -            | -                         | -                       |
| 170          | 2.620                               | 4.212        | 25.0                      | 5708                    | -            | -            | -                         | -                       | -            | -                         | -                       |
| 180          | 2.620                               | 4.212        | 25.0                      | 5708                    | -            | -            | -                         | -                       | -            | -                         | -                       |
| 190          | 2.620                               | 4.212        | 25.0                      | 5708                    | -            | -            | -                         | -                       | -            | -                         | -                       |
| 200          | 2.620                               | 4.212        | 25.0                      | 5708                    | -            | -            | -                         | -                       | -            | -                         | -                       |
| 210          | 2.620                               | 4.212        | 25.0                      | 5708                    | -            | -            | -                         | -                       | -            | -                         | -                       |
| 220          | 2.620                               | 4.212        | 25.0                      | 5708                    | -            | -            | -                         | -                       | -            | -                         | -                       |
| 230          | 2.620                               | 4.212        | 25.0                      | 5708                    | -            | -            | -                         | -                       | -            | -                         | -                       |
| 240          | 2.620                               | 4.212        | 25.0                      | 5708                    | -            | -            | -                         | -                       | -            | -                         | -                       |
| 250          | 2.620                               | 4.212        | 25.0                      | 5708                    | -            | -            | -                         | -                       | -            | -                         | -                       |
| 260          | 2.620                               | 4.212        | 25.0                      | 5708                    | -            | -            | -                         | -                       | -            | -                         | -                       |
| 270          | 2.620                               | 4.212        | 25.0                      | 5708                    | -            | -            | -                         | -                       | -            | -                         | -                       |
| RT           | 2.620                               | 4.212        | 25.0                      | 5708                    | -            | -            | -                         | -                       | -            | -                         | -                       |

Standard deviations of the lattice parameters are  $\pm 0.002$  Å for *a*,  $\pm 0.004$  Å for *c* and  $\pm 0.1$  Å<sup>3</sup> for *V*.

**S3. The diffraction data of the Ni<sub>0.5</sub>Ru<sub>0.5</sub> solid solution and decomposition products at 500 °C obtained by the Rietveld refinement.**

| Time,<br>min | Ni <sub>0.5</sub> Ru <sub>0.5</sub> |              |                           |                         | «Ru»         |              |                           |                         | «Ni»         |                           |                         |
|--------------|-------------------------------------|--------------|---------------------------|-------------------------|--------------|--------------|---------------------------|-------------------------|--------------|---------------------------|-------------------------|
|              | <i>a</i> , Å                        | <i>c</i> , Å | <i>V</i> , Å <sup>3</sup> | <i>I</i> <sub>101</sub> | <i>a</i> , Å | <i>c</i> , Å | <i>V</i> , Å <sup>3</sup> | <i>I</i> <sub>101</sub> | <i>a</i> , Å | <i>V</i> , Å <sup>3</sup> | <i>I</i> <sub>111</sub> |
| 10           | 2.623                               | 4.219        | 25.1                      | 2483                    | -            | -            | -                         | -                       | -            | -                         | -                       |
| 20           | 2.623                               | 4.219        | 25.1                      | 2460                    | -            | -            | -                         | -                       | -            | -                         | -                       |
| 30           | 2.623                               | 4.219        | 25.1                      | 2361                    | 2.666        | 4.238        | 26.1                      | 20                      | 3.552        | 44.8                      | 100                     |
| 40           | 2.623                               | 4.219        | 25.1                      | 2302                    | 2.666        | 4.238        | 26.1                      | 79                      | 3.551        | 44.8                      | 196                     |
| 50           | 2.623                               | 4.219        | 25.1                      | 2303                    | 2.666        | 4.238        | 26.1                      | 212                     | 3.551        | 44.8                      | 204                     |
| 60           | 2.623                               | 4.219        | 25.1                      | 2307                    | 2.666        | 4.238        | 26.1                      | 223                     | 3.555        | 44.9                      | 260                     |
| 70           | 2.623                               | 4.219        | 25.1                      | 2280                    | 2.666        | 4.238        | 26.1                      | 232                     | 3.555        | 44.9                      | 457                     |
| 80           | 2.623                               | 4.219        | 25.1                      | 2216                    | 2.666        | 4.238        | 26.1                      | 239                     | 3.556        | 45.0                      | 459                     |
| 90           | 2.623                               | 4.220        | 25.1                      | 2164                    | 2.666        | 4.238        | 26.1                      | 285                     | 3.553        | 44.9                      | 501                     |
| 100          | 2.623                               | 4.219        | 25.1                      | 2129                    | 2.666        | 4.238        | 26.1                      | 287                     | 3.555        | 44.9                      | 523                     |
| 110          | 2.623                               | 4.219        | 25.1                      | 2115                    | 2.666        | 4.238        | 26.1                      | 332                     | 3.553        | 44.9                      | 529                     |
| 120          | 2.623                               | 4.219        | 25.1                      | 2059                    | 2.666        | 4.238        | 26.1                      | 390                     | 3.556        | 45.0                      | 536                     |
| RT           | 2.620                               | 4.215        | 25.1                      | 2059                    | 2.667        | 4.246        | 26.2                      | 390                     | 3.540        | 44.4                      | 536                     |

Standard deviations of the Ni<sub>0.5</sub>Ru<sub>0.5</sub> and «Ru» lattice parameters are ±0.002 Å for *a*, ±0.004 Å for *c* and ±0.1 Å<sup>3</sup> for *V*.

Standard deviations of the «Ni» lattice parameters are and ±0.003 Å for *a* and ±0.1 Å<sup>3</sup> for *V*.

In accordance with Retgers' rule, "Ru" is a solid solution of the composition Ni<sub>0.20</sub>Ru<sub>0.80</sub> and «Ni» is a solid solution of the composition Ni<sub>0.05</sub>Ru<sub>0.95</sub> at room temperature (RT).

**S4. The diffraction data of the Ni<sub>0.5</sub>Ru<sub>0.5</sub> solid solution and decomposition products at 533 °C obtained by the Rietveld refinement.**

| Time,<br>min | Ni <sub>0.5</sub> Ru <sub>0.5</sub> |              |                           |                         | «Ru»         |              |                           |                         | «Ni»         |                           |                         |
|--------------|-------------------------------------|--------------|---------------------------|-------------------------|--------------|--------------|---------------------------|-------------------------|--------------|---------------------------|-------------------------|
|              | <i>a</i> , Å                        | <i>c</i> , Å | <i>V</i> , Å <sup>3</sup> | <i>I</i> <sub>101</sub> | <i>a</i> , Å | <i>c</i> , Å | <i>V</i> , Å <sup>3</sup> | <i>I</i> <sub>101</sub> | <i>a</i> , Å | <i>V</i> , Å <sup>3</sup> | <i>I</i> <sub>111</sub> |
| 10           | 2.623                               | 4.221        | 25.2                      | 2095                    | 2.666        | 4.248        | 26.1                      | 457                     | 3.557        | 45.0                      | 508                     |
| 20           | 2.624                               | 4.221        | 25.2                      | 1883                    | 2.666        | 4.248        | 26.1                      | 645                     | 3.557        | 45.0                      | 540                     |
| 30           | 2.624                               | 4.221        | 25.2                      | 1776                    | 2.665        | 4.248        | 26.1                      | 760                     | 3.556        | 45.0                      | 577                     |
| 40           | 2.624                               | 4.221        | 25.2                      | 1661                    | 2.666        | 4.250        | 26.2                      | 844                     | 3.558        | 45.0                      | 594                     |
| 50           | 2.624                               | 4.222        | 25.2                      | 1534                    | 2.666        | 4.251        | 26.2                      | 953                     | 3.558        | 45.0                      | 599                     |
| 60           | 2.623                               | 4.222        | 25.2                      | 1467                    | 2.666        | 4.252        | 26.2                      | 1103                    | 3.557        | 45.0                      | 640                     |
| 70           | 2.624                               | 4.222        | 25.2                      | 1401                    | 2.666        | 4.252        | 26.2                      | 1144                    | 3.556        | 45.0                      | 643                     |
| 80           | 2.623                               | 4.222        | 25.2                      | 1279                    | 2.666        | 4.252        | 26.2                      | 1254                    | 3.557        | 45.0                      | 646                     |
| 90           | 2.623                               | 4.224        | 25.2                      | 1223                    | 2.666        | 4.251        | 26.2                      | 1300                    | 3.556        | 45.0                      | 651                     |
| 100          | 2.624                               | 4.223        | 25.2                      | 1195                    | 2.667        | 4.253        | 26.2                      | 1430                    | 3.556        | 45.0                      | 660                     |
| 110          | 2.624                               | 4.224        | 25.2                      | 1096                    | 2.667        | 4.253        | 26.2                      | 1449                    | 3.556        | 45.0                      | 665                     |
| 120          | 2.623                               | 4.226        | 25.2                      | 1001                    | 2.667        | 4.254        | 26.2                      | 1495                    | 3.556        | 45.0                      | 668                     |
| 130          | 2.621                               | 4.240        | 25.2                      | 936                     | 2.667        | 4.255        | 26.2                      | 1645                    | 3.556        | 45.0                      | 674                     |
| 140          | 2.620                               | 4.247        | 25.2                      | 868                     | 2.667        | 4.252        | 26.2                      | 1667                    | 3.556        | 45.0                      | 704                     |
| 150          | 2.620                               | 4.247        | 25.2                      | 806                     | 2.668        | 4.253        | 26.2                      | 1748                    | 3.556        | 45.0                      | 710                     |
| 160          | 2.619                               | 4.247        | 25.2                      | 790                     | 2.668        | 4.254        | 26.2                      | 1802                    | 3.555        | 44.9                      | 715                     |
| 170          | 2.619                               | 4.247        | 25.2                      | 857                     | 2.668        | 4.254        | 26.2                      | 1857                    | 3.556        | 45.0                      | 741                     |
| 180          | 2.618                               | 4.251        | 25.2                      | 735                     | 2.669        | 4.253        | 26.2                      | 1871                    | 3.556        | 45.0                      | 759                     |
| 190          | 2.619                               | 4.250        | 25.2                      | 719                     | 2.668        | 4.254        | 26.2                      | 1879                    | 3.555        | 44.9                      | 796                     |
| 200          | 2.619                               | 4.249        | 25.2                      | 640                     | 2.668        | 4.255        | 26.2                      | 1915                    | 3.555        | 44.9                      | 812                     |
| 210          | 2.619                               | 4.251        | 25.3                      | 613                     | 2.669        | 4.255        | 26.2                      | 1990                    | 3.554        | 44.9                      | 815                     |
| 220          | 2.618                               | 4.251        | 25.2                      | 600                     | 2.669        | 4.254        | 26.2                      | 2039                    | 3.555        | 44.9                      | 816                     |
| 230          | 2.618                               | 4.252        | 25.2                      | 551                     | 2.669        | 4.255        | 26.2                      | 2044                    | 3.555        | 44.9                      | 830                     |
| 240          | 2.618                               | 4.253        | 25.2                      | 529                     | 2.669        | 4.255        | 26.2                      | 2046                    | 3.555        | 44.9                      | 866                     |
| 250          | 2.618                               | 4.252        | 25.2                      | 450                     | 2.669        | 4.255        | 26.2                      | 2069                    | 3.555        | 44.9                      | 944                     |
| 260          | 2.618                               | 4.252        | 25.2                      | 450                     | 2.669        | 4.255        | 26.2                      | 2069                    | 3.555        | 44.9                      | 944                     |
| RT           | 2.620                               | 4.215        | 25.1                      | 450                     | 2.667        | 4.246        | 26.2                      | 2069                    | 3.540        | 44.4                      | 944                     |

Standard deviations of the Ni<sub>0.5</sub>Ru<sub>0.5</sub> and «Ru» lattice parameters are ±0.002 Å for *a*, ±0.004 Å for *c* and ±0.1 Å<sup>3</sup> for *V*.

Standard deviations of the «Ni» lattice parameters are and ±0.003 Å for *a* and ±0.1 Å<sup>3</sup> for *V*.

In accordance with Retgers' rule, "Ru" is a solid solution of the composition Ni<sub>0.20</sub>Ru<sub>0.80</sub> and «Ni» is a solid solution of the composition Ni<sub>0.05</sub>Ru<sub>0.95</sub> at room temperature (RT).

**S5. The diffraction data of the Ni<sub>0.5</sub>Ru<sub>0.5</sub> solid solution and decomposition products at 566 °C obtained by the Rietveld refinement.**

| Time,<br>min | Ni <sub>0.5</sub> Ru <sub>0.5</sub> |              |                           |                         | «Ru»         |              |                           |                         | «Ni»         |                           |                         |
|--------------|-------------------------------------|--------------|---------------------------|-------------------------|--------------|--------------|---------------------------|-------------------------|--------------|---------------------------|-------------------------|
|              | <i>a</i> , Å                        | <i>c</i> , Å | <i>V</i> , Å <sup>3</sup> | <i>I</i> <sub>101</sub> | <i>a</i> , Å | <i>c</i> , Å | <i>V</i> , Å <sup>3</sup> | <i>I</i> <sub>101</sub> | <i>a</i> , Å | <i>V</i> , Å <sup>3</sup> | <i>I</i> <sub>111</sub> |
| 10           | 2.624                               | 4.221        | 25.2                      | 1883                    | 2.666        | 4.248        | 26.1                      | 645                     | 3.557        | 45.0                      | 540                     |
| 20           | 2.624                               | 4.221        | 25.2                      | 1776                    | 2.665        | 4.248        | 26.1                      | 760                     | 3.556        | 45.0                      | 577                     |
| 30           | 2.624                               | 4.221        | 25.2                      | 1661                    | 2.666        | 4.250        | 26.2                      | 844                     | 3.558        | 45.0                      | 594                     |
| 40           | 2.624                               | 4.222        | 25.2                      | 1534                    | 2.666        | 4.251        | 26.2                      | 953                     | 3.558        | 45.0                      | 599                     |
| 50           | 2.623                               | 4.222        | 25.2                      | 1467                    | 2.666        | 4.252        | 26.2                      | 1103                    | 3.557        | 45.0                      | 640                     |
| 60           | 2.624                               | 4.222        | 25.2                      | 1401                    | 2.666        | 4.252        | 26.2                      | 1144                    | 3.556        | 45.0                      | 643                     |
| 70           | 2.623                               | 4.222        | 25.2                      | 1279                    | 2.666        | 4.252        | 26.2                      | 1254                    | 3.557        | 45.0                      | 646                     |
| 80           | 2.623                               | 4.224        | 25.2                      | 1223                    | 2.666        | 4.251        | 26.2                      | 1300                    | 3.556        | 45.0                      | 651                     |
| 90           | 2.624                               | 4.223        | 25.2                      | 1195                    | 2.667        | 4.253        | 26.2                      | 1430                    | 3.556        | 45.0                      | 660                     |
| 100          | 2.624                               | 4.224        | 25.2                      | 1096                    | 2.667        | 4.253        | 26.2                      | 1449                    | 3.556        | 45.0                      | 665                     |
| 110          | 2.623                               | 4.226        | 25.2                      | 1001                    | 2.667        | 4.254        | 26.2                      | 1495                    | 3.556        | 45.0                      | 668                     |
| 120          | 2.621                               | 4.240        | 25.2                      | 936                     | 2.667        | 4.255        | 26.2                      | 1645                    | 3.556        | 45.0                      | 674                     |
| 130          | 2.620                               | 4.247        | 25.2                      | 868                     | 2.667        | 4.252        | 26.2                      | 1667                    | 3.556        | 45.0                      | 704                     |
| 140          | 2.620                               | 4.247        | 25.2                      | 806                     | 2.668        | 4.253        | 26.2                      | 1748                    | 3.556        | 45.0                      | 710                     |
| 150          | 2.619                               | 4.247        | 25.2                      | 790                     | 2.668        | 4.254        | 26.2                      | 1802                    | 3.555        | 44.9                      | 715                     |
| 160          | 2.619                               | 4.247        | 25.2                      | 857                     | 2.668        | 4.254        | 26.2                      | 1857                    | 3.556        | 45.0                      | 741                     |
| 170          | 2.618                               | 4.251        | 25.2                      | 735                     | 2.669        | 4.253        | 26.2                      | 1871                    | 3.556        | 45.0                      | 759                     |
| 180          | 2.619                               | 4.250        | 25.2                      | 719                     | 2.668        | 4.254        | 26.2                      | 1879                    | 3.555        | 44.9                      | 796                     |
| RT           | 2.623                               | 4.215        | 25.1                      | 450                     | 2.671        | 4.253        | 26.3                      | 2069                    | 3.546        | 44.6                      | 944                     |

Standard deviations of the Ni<sub>0.5</sub>Ru<sub>0.5</sub> and «Ru» lattice parameters are ±0.002 Å for *a*, ±0.004 Å for *c* and ±0.1 Å<sup>3</sup> for *V*.

Standard deviations of the «Ni» lattice parameters are and ±0.003 Å for *a* and ±0.1 Å<sup>3</sup> for *V*.

In accordance with Retgers' rule, "Ru" is a solid solution of the composition Ni<sub>0.20</sub>Ru<sub>0.80</sub> and «Ni» is a solid solution of the composition Ni<sub>0.05</sub>Ru<sub>0.95</sub> at room temperature (RT).

**S6. The diffraction data of the Ni<sub>0.5</sub>Ru<sub>0.5</sub> solid solution and decomposition products at 600 °C obtained by the Rietveld refinement.**

| Time,<br>min | Ni <sub>0.5</sub> Ru <sub>0.5</sub> |              |                           |                         | «Ru»         |              |                           |                         | «Ni»         |                           |                         |
|--------------|-------------------------------------|--------------|---------------------------|-------------------------|--------------|--------------|---------------------------|-------------------------|--------------|---------------------------|-------------------------|
|              | <i>a</i> , Å                        | <i>c</i> , Å | <i>V</i> , Å <sup>3</sup> | <i>I</i> <sub>101</sub> | <i>a</i> , Å | <i>c</i> , Å | <i>V</i> , Å <sup>3</sup> | <i>I</i> <sub>101</sub> | <i>a</i> , Å | <i>V</i> , Å <sup>3</sup> | <i>I</i> <sub>111</sub> |
| 10           | 2.623                               | 4.215        | 25.1                      | 4194                    | 2.698        | 4.308        | 27.2                      | 1650                    | 3.567        | 45.4                      | 1113                    |
| 20           | 2.623                               | 4.220        | 25.1                      | 2920                    | 2.655        | 4.269        | 26.1                      | 2515                    | 3.555        | 44.9                      | 1535                    |
| 30           | 2.623                               | 4.220        | 25.1                      | 1665                    | 2.664        | 4.252        | 26.1                      | 2570                    | 3.555        | 44.9                      | 1633                    |
| 40           | 2.623                               | 4.220        | 25.1                      | 1313                    | 2.666        | 4.254        | 26.2                      | 2751                    | 3.555        | 44.9                      | 1744                    |
| 50           | 2.622                               | 4.246        | 25.3                      | 1159                    | 2.667        | 4.255        | 26.2                      | 2816                    | 3.555        | 44.9                      | 1843                    |
| 60           | 2.635                               | 4.251        | 25.6                      | 1021                    | 2.670        | 4.257        | 26.3                      | 2833                    | 3.555        | 44.9                      | 1883                    |
| 70           | 2.635                               | 4.253        | 25.6                      | 940                     | 2.670        | 4.258        | 26.3                      | 2993                    | 3.555        | 44.9                      | 1995                    |
| 80           | 2.635                               | 4.253        | 25.6                      | 923                     | 2.672        | 4.259        | 26.3                      | 2923                    | 3.555        | 44.9                      | 2019                    |
| 90           | 2.635                               | 4.253        | 25.6                      | 854                     | 2.672        | 4.260        | 26.4                      | 3053                    | 3.555        | 44.9                      | 2098                    |
| 100          | 2.635                               | 4.253        | 25.6                      | 820                     | 2.674        | 4.260        | 26.4                      | 3164                    | 3.555        | 44.9                      | 2134                    |
| 110          | 2.635                               | 4.253        | 25.6                      | 756                     | 2.675        | 4.261        | 26.4                      | 3304                    | 3.556        | 45.0                      | 2315                    |
| 120          | 2.635                               | 4.253        | 25.6                      | 742                     | 2.675        | 4.263        | 26.4                      | 3325                    | 3.556        | 45.0                      | 2327                    |
| 130          | 2.635                               | 4.253        | 25.6                      | 732                     | 2.676        | 4.263        | 26.4                      | 3341                    | 3.556        | 45.0                      | 2334                    |
| RT           | 2.623                               | 4.215        | 25.1                      | 732                     | 2.671        | 4.253        | 26.3                      | 3341                    | 3.546        | 44.6                      | 2334                    |

Standard deviations of the Ni<sub>0.5</sub>Ru<sub>0.5</sub> and «Ru» lattice parameters are ±0.002 Å for *a*, ±0.004 Å for *c* and ±0.1 Å<sup>3</sup> for *V*.

Standard deviations of the «Ni» lattice parameters are and ±0.003 Å for *a* and ±0.1 Å<sup>3</sup> for *V*.

In accordance with Retgers' rule, "Ru" is a solid solution of the composition Ni<sub>0.20</sub>Ru<sub>0.80</sub> and «Ni» is a solid solution of the composition Ni<sub>0.05</sub>Ru<sub>0.95</sub> at room temperature (RT).

S7. Initial DSC curves of  $\text{Ni}_{0.5}\text{Ru}_{0.5}$  heating with different rate:  $10 \text{ K min}^{-1}$  (green),  $30 \text{ K min}^{-1}$  (blue) and  $50 \text{ K min}^{-1}$  (red).

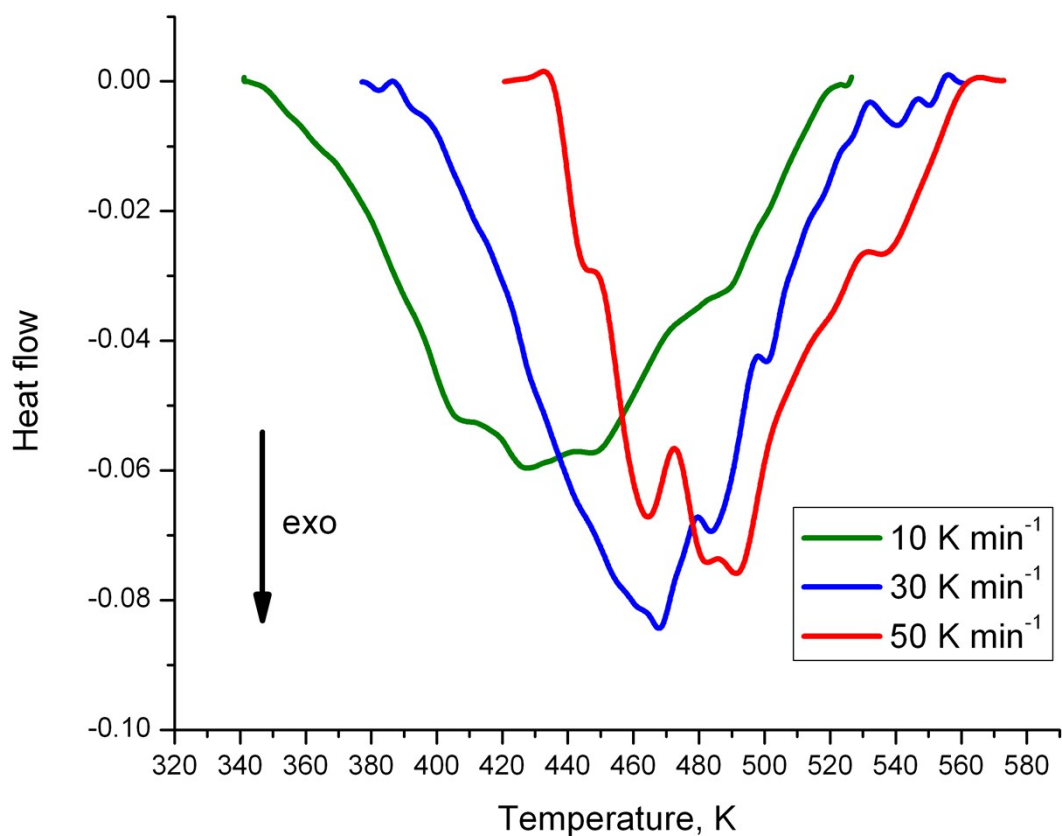

Supplement: d4nj01919a1.pdf [file d4nj01919a1.pdf]
